# Supplementary material for: The Warps and Wefts of a Polyploidy Complex: Integrative Species Delimitation of the Diploid Leucanthemum (Compositae, Anthemideae) Representatives
Source: MDPI journal article supplement (doi:10.3390/plants11141878), 2022-07-19
Supplement: s1 [file s1]

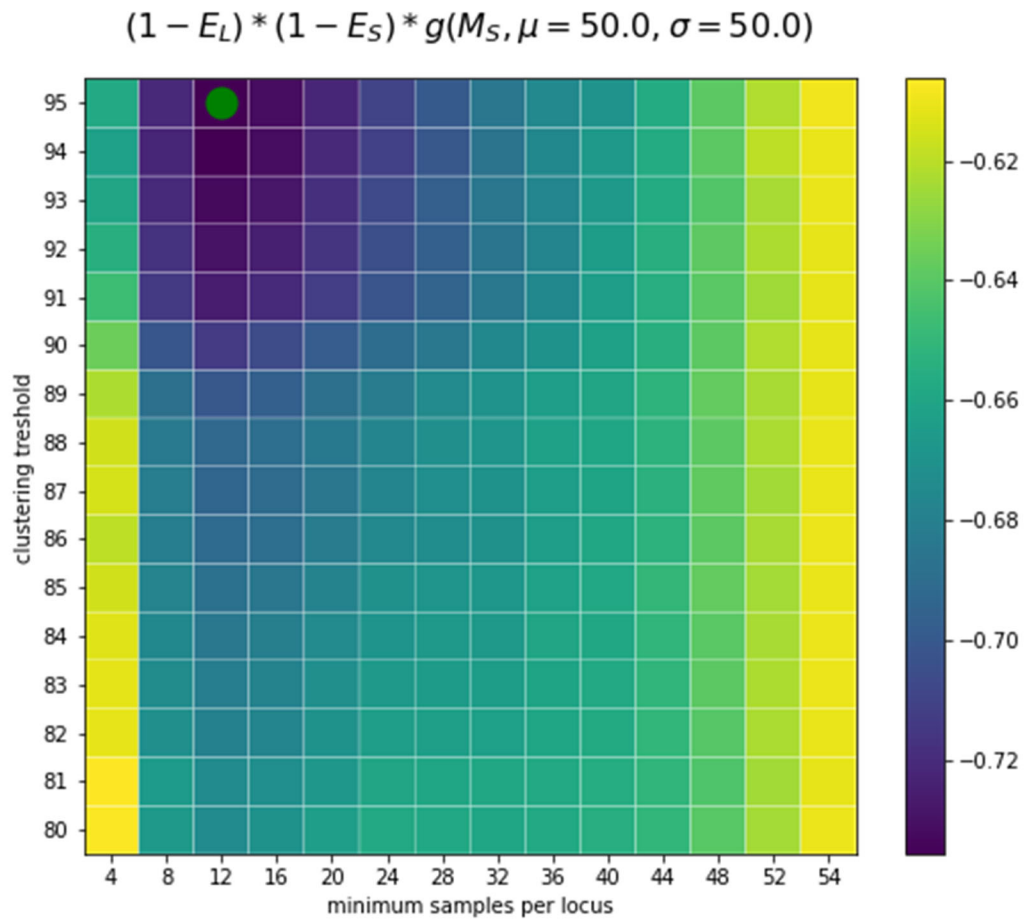

**Figure S1.** Results of the grid-search optimization of iPyrad assembly parameters ct and msl. Darker colors indicate more optimal parameter combinations. The optimum is marked by the green dot.
