# Supplementary figures and images for: The Warps and Wefts of a Polyploidy Complex: Integrative Species Delimitation of the Diploid Leucanthemum (Compositae, Anthemideae) Representatives
Source: MDPI journal article supplement (doi:10.3390/plants11141878), 2022-07-19

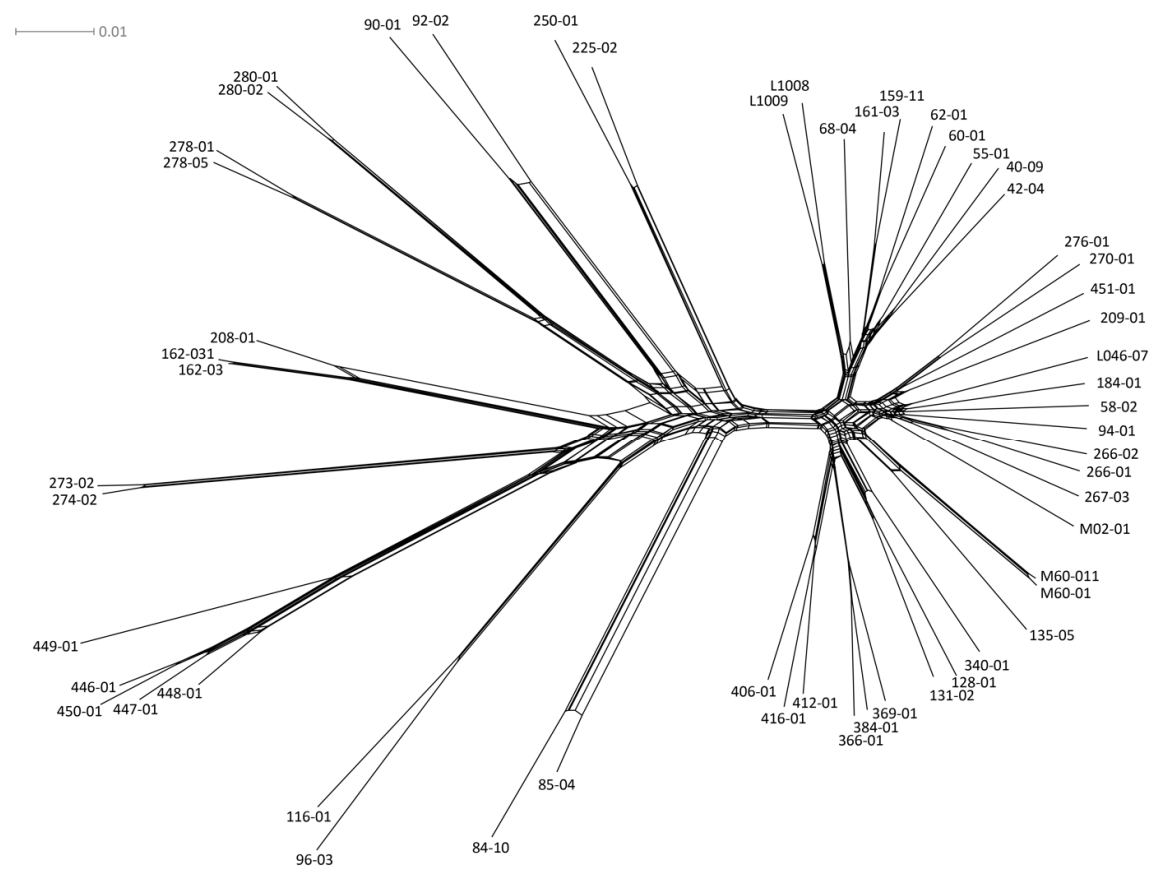

**Figure S2.** NeighborNet network based on nucleotide Nei distances.

Supplement: s1 [file s1]
